# Supplementary material for: New Myrtenal–Adamantane Conjugates Alleviate Alzheimer’s-Type Dementia in Rat Model
Source: MDPI journal article supplement (doi:10.3390/molecules27175456), 2022-08-25
Supplement: s1 [file s1]

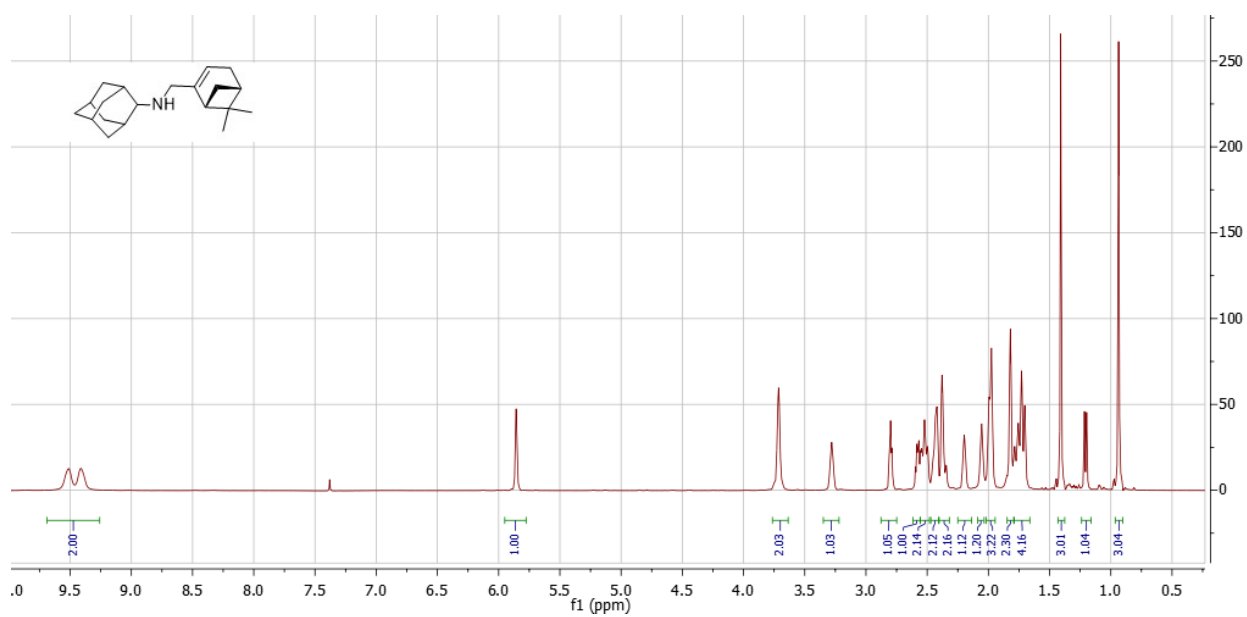

**Figure S1.**  $^1\text{H}$  NMR spectrum of compound MAC-197

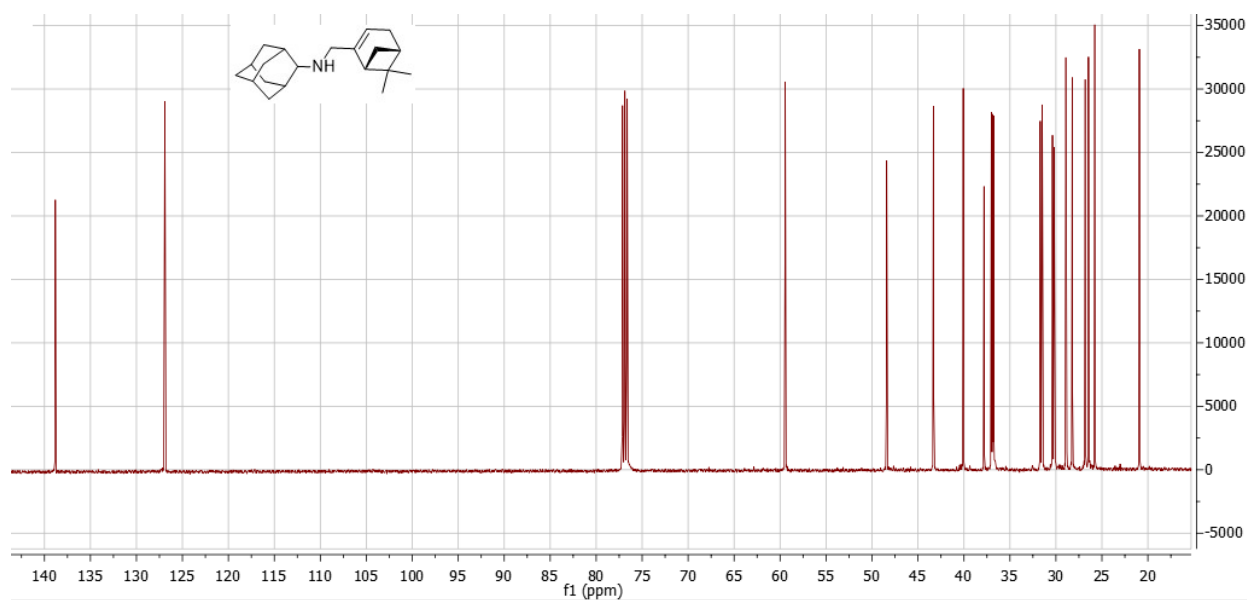

**Figure S2.**  $^{13}\text{C}$  NMR spectrum of compound MAC-197

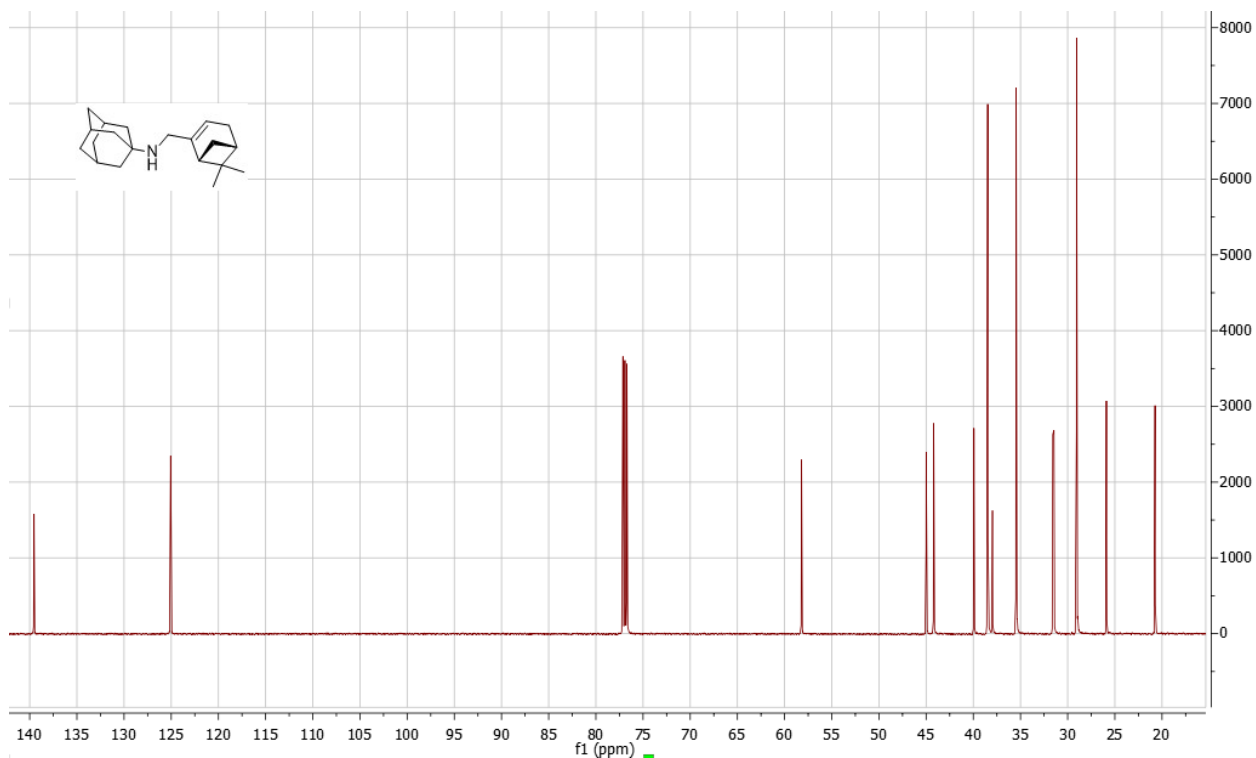

**FigureS3.**  $^1\text{H}$  NMR spectrum of compound MAC-198

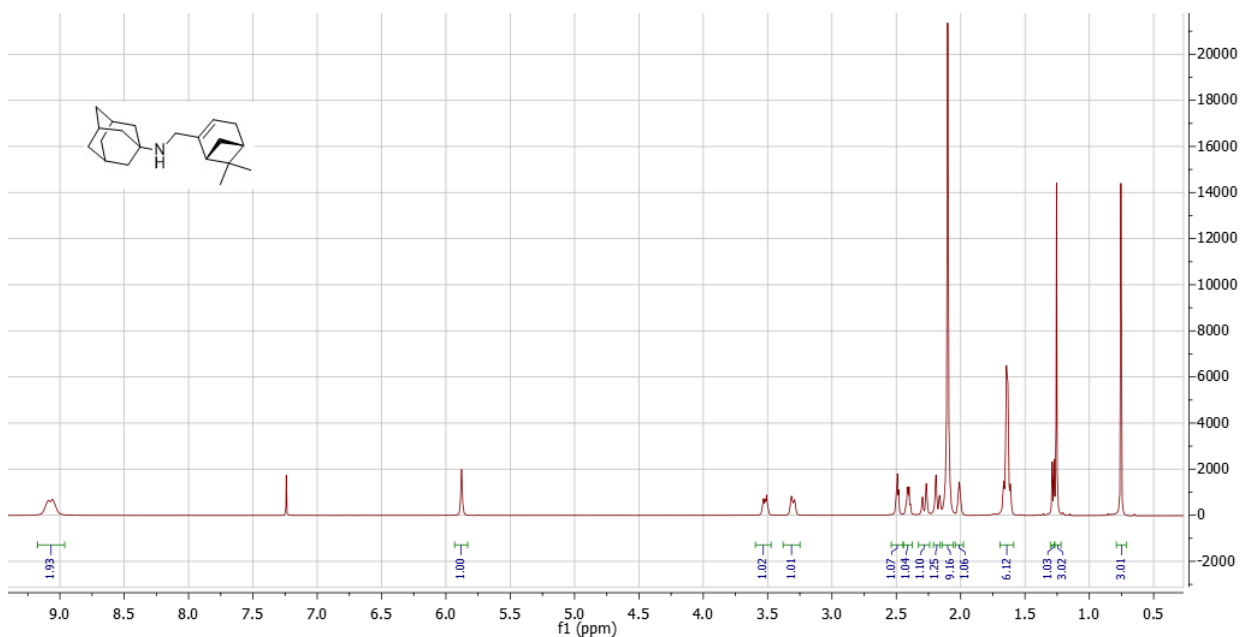

**Figure S4.**  $^{13}\text{C}$  NMR spectrum of compound MAC-198

**Table S1.** Definition of lead-like, drug-like and Known Drug Space (KDS) in terms of molecular descriptors. The values given are the maxima for each descriptor for the volumes of chemical space used.

|                                             | Lead-like Space | Drug-like Space | Known Drug Space |
|---------------------------------------------|-----------------|-----------------|------------------|
| Molecular weight ( $\text{g mol}^{-1}$ )    | 300             | 500             | 800              |
| Lipophilicity (Log P)                       | 3               | 5               | 6.5              |
| Hydrogen bond donors (HD)                   | 3               | 5               | 7                |
| Hydrogen bond acceptors (HA)                | 3               | 10              | 15               |
| Polar surface area ( $\text{\AA}^2$ ) (PSA) | 60              | 140             | 180              |
| Rotatable bonds (RB)                        | 3               | 10              | 17               |

**Table S2.** The 208 molecules with measured blood-brain-barrier permeability (Log BB) and their corresponding molecular descriptors.

| Molecule                       | LogBB | RB | MW    | HD   | HA    | LogP | PSA   |
|--------------------------------|-------|----|-------|------|-------|------|-------|
| 1,1,1-Trichloroethane          | 0.40  | 0  | 133.4 | 0    | 0     | 2.4  | 0.0   |
| 1,1,1-trifluoro-2-chloroethane | 0.08  | 0  | 118.5 | 0    | 0     | 2.3  | 0.0   |
| 1,2,3,4-Tetrahydroquinoline    | 0.70  | 0  | 133.2 | 1    | 1     | 2.2  | 13.7  |
| 1,2-dichloroethane             | -0.14 | 0  | 99.0  | 0    | 0     | 1.5  | 0.0   |
| 1-Butanol                      | -0.02 | 3  | 74.1  | 1    | 1.7   | 0.9  | 23.3  |
| 1-hydroxymidazolam             | -0.07 | 2  | 341.8 | 1    | 4.2   | 4.1  | 53.7  |
| 1-propanol                     | -0.16 | 2  | 60.1  | 1    | 1.7   | 0.3  | 23.3  |
| 2,2-dimethylbutane             | 1.04  | 1  | 86.2  | 0    | 0     | 3.6  | 0.0   |
| 2-bromopropane                 | 0.56  | 0  | 123.0 | 0    | 0     | 1.6  | 0.0   |
| 2-methylpentane                | 0.97  | 2  | 86.2  | 0    | 0     | 3.6  | 0.0   |
| 2-Methylpropanol               | -0.17 | 2  | 74.1  | 1    | 1.7   | 0.8  | 21.7  |
| 2-Propanol                     | -0.15 | 1  | 60.1  | 1    | 1.7   | 0.1  | 22.4  |
| 3-Methylhexane                 | 0.90  | 3  | 100.2 | 0    | 0     | 4.0  | 0.0   |
| 3-Methylpentane                | 1.01  | 2  | 86.2  | 0    | 0     | 3.6  | 0.0   |
| 4-hydroxyalprazolam            | -1.48 | 1  | 324.8 | 1    | 4.7   | 3.4  | 69.9  |
| 4-Hydroxymidazolam             | -0.30 | 1  | 341.8 | 1    | 4.2   | 4.1  | 53.4  |
| Acebutolol                     | -0.15 | 11 | 336.4 | 3    | 8.45  | 1.7  | 102.0 |
| acetaminophen                  | -0.31 | 2  | 151.2 | 2    | 3.25  | 0.5  | 60.0  |
| Acetone                        | -0.15 | 0  | 58.1  | 0    | 2     | -0.2 | 30.5  |
| Alovudine                      | -0.59 | 2  | 244.2 | 2    | 6.9   | 0.2  | 100.4 |
| Alprazolam                     | 0.02  | 0  | 308.8 | 0    | 3     | 4.4  | 48.8  |
| Alprenolol                     | -0.23 | 9  | 249.4 | 2    | 3.95  | 3.1  | 41.8  |
| Aminopyrine                    | 0.00  | 1  | 231.3 | 0    | 5     | 1.0  | 32.9  |
| amitriptyline                  | 0.89  | 3  | 277.4 | 0    | 2     | 5.0  | 6.1   |
| amobarbital                    | 0.04  | 5  | 226.3 | 2    | 5.5   | 0.9  | 93.1  |
| amphetamine                    | 0.93  | 3  | 135.2 | 2    | 1     | 1.8  | 22.9  |
| antipyrine                     | -0.10 | 0  | 188.2 | 0    | 4     | 0.4  | 33.4  |
| Apaxifylline                   | -1.40 | 4  | 318.4 | 1    | 7     | 2.1  | 110.1 |
| Aspirin                        | -0.61 | 2  | 180.2 | 1    | 4.5   | 1.2  | 81.8  |
| Atenolol                       | -0.87 | 9  | 266.3 | 4    | 6.45  | 0.1  | 93.6  |
| atropine                       | -0.06 | 5  | 289.4 | 0    | 4.7   | 1.9  | 60.2  |
| Barbital                       | -0.14 | 2  | 184.2 | 2    | 4     | 0.6  | 100.6 |
| Benzene                        | 0.37  | 0  | 78.1  | 0    | 0     | 2.1  | 0.0   |
| Benzocaine                     | 0.27  | 3  | 165.2 | 1.5  | 3     | 1.9  | 61.2  |
| Betahistine                    | -0.34 | 3  | 136.2 | 1    | 2.5   | 1.4  | 27.2  |
| Bretazenil                     | -0.09 | 2  | 418.3 | 0    | 6.5   | 3.3  | 66.9  |
| Bromocriptine                  | -1.10 | 6  | 654.6 | 2.25 | 10.75 | 3.5  | 114.5 |
| Bromperidol                    | 1.38  | 6  | 420.3 | 1    | 4.75  | 4.4  | 51.1  |
| Bupropion                      | 1.40  | 4  | 239.7 | 1    | 3     | 3.0  | 36.2  |
| Buspirone                      | 0.50  | 5  | 385.5 | 0    | 7.5   | 3.1  | 82.4  |
| Butamben                       | 0.42  | 5  | 193.2 | 1.5  | 3     | 2.2  | 61.2  |
| Butanone                       | -0.08 | 1  | 72.1  | 0    | 2     | 0.3  | 27.8  |
| Caffeine                       | -0.10 | 0  | 194.2 | 0    | 5     | -0.1 | 72.4  |
| Carbamazepine                  | -0.14 | 0  | 236.3 | 2    | 2     | 2.3  | 49.4  |

|                        |       |    |       |      |       |      |       |
|------------------------|-------|----|-------|------|-------|------|-------|
| Carbon Disulfide       | 0.60  | 0  | 76.1  | 0    | 3     | 1.0  | 0.0   |
| Carmustine             | −0.52 | 5  | 214.1 | 1    | 4.5   | 1.9  | 73.3  |
| Carteolol              | 0.01  | 7  | 292.4 | 3    | 5.95  | 1.4  | 77.6  |
| Cefotetan              | −1.89 | 9  | 575.6 | 2.25 | 12.5  | 0.7  | 240.3 |
| Chlorambucil           | −1.70 | 7  | 304.2 | 1    | 3     | 4.6  | 55.4  |
| Chloroform             | 0.30  | 0  | 119.4 | 0    | 0     | 2.0  | 0.0   |
| Chlorotrifluoroethane  | −0.08 | 0  | 118.5 | 0    | 0     | 2.3  | 0.0   |
| Chlorpromazine         | 1.06  | 4  | 318.9 | 0    | 2.5   | 5.1  | 10.0  |
| Cimetidine             | −1.42 | 7  | 252.3 | 3    | 5.5   | 0.4  | 101.0 |
| Clobazam               | 0.40  | 0  | 300.7 | 0    | 6     | 2.1  | 55.6  |
| Clonidine              | 0.10  | 2  | 230.1 | 2    | 2.5   | 1.6  | 31.9  |
| Cocaine                | 0.60  | 3  | 303.4 | 0    | 6     | 2.3  | 58.1  |
| Codeine                | 0.60  | 2  | 299.4 | 1    | 5.2   | 1.2  | 42.9  |
| Cotinine               | −0.22 | 0  | 176.2 | 0    | 4.5   | 0.3  | 43.8  |
| Cyclohexane            | 0.90  | 0  | 84.2  | 0    | 0     | 2.9  | 0.0   |
| Cyclopropane           | 0.00  | 0  | 42.1  | 0    | 0     | 2.1  | 0.0   |
| Decane                 | 0.67  | 7  | 142.3 | 0    | 0     | 6.1  | 0.0   |
| Desflurane             | 0.11  | 1  | 168.0 | 0    | 0     | 2.1  | 8.9   |
| Desipramine            | 1.20  | 4  | 266.4 | 1    | 2     | 4.8  | 18.6  |
| Desmethyloclobazam     | 0.36  | 0  | 286.7 | 1    | 5.5   | 1.9  | 66.5  |
| Desmethyldiazepam      | 0.50  | 0  | 270.7 | 1    | 2     | 4.4  | 59.9  |
| Desmonomethylpromazine | 0.59  | 4  | 270.4 | 1    | 2     | 4.2  | 18.5  |
| Diazepam               | 0.50  | 0  | 284.7 | 0    | 4     | 3.0  | 46.0  |
| Dichloromethane        | −0.10 | 0  | 84.9  | 0    | 0     | 1.4  | 0.0   |
| Didanosine             | −1.30 | 2  | 236.2 | 2    | 8.4   | −0.5 | 101.6 |
| Diethyl ether          | 0.00  | 2  | 74.1  | 0    | 1.7   | 0.9  | 8.8   |
| Digoxin                | −0.04 | 12 | 780.9 | 6    | 22.45 | 1.5  | 194.8 |
| Diphenhydramine        | 1.26  | 6  | 255.4 | 0    | 3.7   | 3.3  | 13.5  |
| divinyl ether          | 0.11  | 2  | 70.1  | 0    | 0.5   | 1.8  | 9.9   |
| Domperidone            | −0.80 | 4  | 425.9 | 2    | 6     | 3.9  | 98.5  |
| Donepezil              | 0.89  | 6  | 379.5 | 0    | 5.5   | 4.4  | 42.2  |
| Doxylamine             | 0.64  | 6  | 270.4 | 0    | 3.75  | 3.3  | 18.2  |
| Enflurane              | 0.24  | 1  | 184.5 | 0    | 0     | 2.3  | 9.3   |
| Enoxolone              | −1.40 | 2  | 470.7 | 2    | 5.7   | 4.9  | 85.6  |
| Ethanol                | −0.16 | 1  | 46.1  | 1    | 1.7   | −0.3 | 23.3  |
| Ethenzamide            | −0.05 | 3  | 165.2 | 2    | 3.25  | 0.9  | 58.0  |
| Ethylbenzene           | 0.20  | 1  | 106.2 | 0    | 0     | 3.1  | 0.0   |
| Etodolac               | −1.42 | 4  | 287.4 | 2    | 2.75  | 3.9  | 60.8  |
| etoposide              | −2.00 | 7  | 588.6 | 3    | 16.95 | 0.6  | 162.4 |
| Fentanyl               | 0.59  | 6  | 336.5 | 0    | 5     | 4.1  | 31.2  |
| Fexofenadine           | −0.98 | 12 | 501.7 | 3    | 6.45  | 3.9  | 87.8  |
| Flumazenil             | −0.30 | 2  | 303.3 | 0    | 6.5   | 1.9  | 76.8  |
| flunitrazepam          | 0.06  | 1  | 313.3 | 0    | 5     | 2.3  | 87.6  |
| Fluoromar              | 0.13  | 2  | 126.1 | 0    | 0     | 1.8  | 9.5   |
| Fluoxetine             | 0.72  | 6  | 309.3 | 1    | 2.25  | 4.6  | 21.9  |
| fluphenazine           | 1.51  | 7  | 437.5 | 1    | 6.2   | 4.3  | 38.5  |
| Galanthamine           | 0.32  | 2  | 287.4 | 1    | 5.2   | 2.0  | 46.6  |
| Gentisic acid          | 0.10  | 3  | 154.1 | 2    | 2.5   | 0.8  | 91.1  |
| Granisetron            | −0.69 | 2  | 312.4 | 1    | 5.5   | 2.5  | 55.5  |
| haloperidol            | 1.34  | 0  | 197.4 | 1    | 4.76  | 2.3  | 49.6  |

|                    |       |    |       |      |       |      |       |
|--------------------|-------|----|-------|------|-------|------|-------|
| Halothane          | 0.35  | 6  | 375.9 | 0    | 0     | 2.3  | 0.0   |
| Heptane            | 0.81  | 4  | 100.2 | 0    | 0     | 4.7  | 0.0   |
| Hexane             | 0.80  | 3  | 86.2  | 0    | 0     | 3.9  | 0.0   |
| Hexobarbital       | 0.10  | 0  | 236.3 | 1    | 4     | 1.5  | 85.7  |
| Hydroxyzine        | 0.39  | 9  | 374.9 | 1    | 7.4   | 2.8  | 43.5  |
| Ibuprofen          | −0.18 | 4  | 206.3 | 1    | 2     | 3.5  | 46.9  |
| icotidine          | −2.00 | 9  | 379.5 | 2    | 6.75  | 2.9  | 89.7  |
| imipramine         | 1.06  | 4  | 280.4 | 0    | 2.5   | 4.4  | 10.0  |
| indinavir          | −0.75 | 14 | 613.8 | 4    | 13.9  | 2.6  | 110.8 |
| indomethacin       | −1.26 | 4  | 357.8 | 1    | 5.75  | 4.2  | 84.5  |
| Iodophenazone      | −0.10 | 0  | 314.1 | 0    | 4     | 1.6  | 33.3  |
| Isoflurane         | 0.42  | 1  | 184.5 | 0    | 0     | 2.1  | 9.0   |
| Lamotrigine        | 0.29  | 1  | 256.1 | 4    | 4     | 0.9  | 80.9  |
| Levodopa           | −0.80 | 6  | 197.2 | 5    | 4.5   | −2.5 | 114.0 |
| Levorphanol        | 0.00  | 1  | 257.4 | 1    | 2.75  | 2.9  | 28.5  |
| Lidocaine          | 0.34  | 6  | 234.3 | 1    | 3     | 1.6  | 35.9  |
| Loperamide         | 0.77  | 7  | 477.0 | 1    | 5.75  | 5.9  | 47.9  |
| Lorazepam          | 0.44  | 1  | 321.2 | 2    | 3.7   | 3.2  | 78.1  |
| Mannitol           | −2.51 | 11 | 182.2 | 6    | 10.2  | −3.1 | 124.1 |
| Mefloquine         | 0.63  | 3  | 378.3 | 2    | 4.2   | 3.8  | 38.0  |
| Methanol           | 0.02  | 0  | 32.0  | 1    | 1.7   | −0.8 | 24.1  |
| Mepyramine         | 0.49  | 7  | 285.4 | 0    | 4.25  | 3.3  | 27.9  |
| Mesoridazine       | −0.40 | 4  | 386.6 | 0    | 6.5   | 4.0  | 25.5  |
| Methamphetamine    | 0.99  | 3  | 149.2 | 1    | 1.5   | 2.0  | 14.4  |
| Methane            | 0.04  | 0  | 16.0  | 0    | 0     | 1.1  | 0.0   |
| Methotrexate       | −1.52 | 11 | 454.4 | 6.25 | 11.75 | −1.8 | 228.6 |
| Methoxyflurane     | 0.30  | 1  | 165.0 | 0    | 0     | 2.4  | 8.3   |
| Methylcyclopentane | 0.93  | 0  | 84.2  | 0    | 0     | 3.4  | 0.0   |
| Metoprolol         | 1.15  | 10 | 267.4 | 2    | 5.65  | 1.9  | 51.7  |
| Mianserin          | 0.99  | 0  | 264.4 | 0    | 3     | 3.3  | 10.0  |
| Midazolam          | 0.40  | 0  | 325.8 | 0    | 2.5   | 5.2  | 32.6  |
| Miloxacin          | −0.92 | 2  | 263.2 | 0    | 6.7   | 0.3  | 106.2 |
| Mirtazapine        | 0.50  | 0  | 265.4 | 0    | 3.5   | 3.4  | 17.3  |
| Morphine           | −0.20 | 2  | 285.3 | 2    | 5.2   | 0.9  | 60.7  |
| Nalidixic acid     | −0.66 | 2  | 232.2 | 0    | 4.5   | 1.6  | 86.6  |
| Nevirapine         | 0.00  | 0  | 266.3 | 1    | 5     | 2.4  | 51.8  |
| Nicotine           | 0.38  | 0  | 162.2 | 0    | 3.5   | 1.1  | 18.5  |
| nitrogen           | 0.03  | 0  | 17.0  | 3    | 0.5   | −2.0 | 43.1  |
| nitrous oxide      | 0.03  | 0  | 44.0  | 0    | 4     | −2.5 | 63.8  |
| Northioridazine    | 0.80  | 4  | 356.5 | 1    | 2.5   | 5.4  | 17.9  |
| Octane             | 0.69  | 5  | 114.2 | 0    | 0     | 4.8  | 0.0   |
| Olanzapine         | 0.78  | 0  | 312.4 | 1    | 4     | 3.5  | 37.8  |
| Omeprazole         | −0.82 | 5  | 345.4 | 1    | 8     | 2.2  | 70.1  |
| oxazepam           | 0.61  | 1  | 286.7 | 2    | 3.7   | 3.5  | 80.6  |
| Oxirane            | 0.01  | 0  | 44.1  | 0    | 2     | −0.5 | 13.7  |
| Paliperidone       | −0.67 | 4  | 426.5 | 1    | 9.2   | 2.5  | 91.2  |
| Paraxanthine       | 0.10  | 0  | 180.2 | 1    | 5     | 0.0  | 86.6  |
| Pentane            | 0.76  | 2  | 72.2  | 0    | 0     | 3.4  | 0.0   |
| Pentazocine        | 0.51  | 3  | 285.4 | 1    | 2.75  | 3.6  | 27.2  |
| Pentobarbital      | 0.10  | 4  | 226.3 | 2    | 4     | 2.1  | 95.9  |

|                     |       |    |       |      |      |      |       |
|---------------------|-------|----|-------|------|------|------|-------|
| Pentylentetrazol    | −0.03 | 0  | 138.2 | 0    | 3    | 0.5  | 50.5  |
| Perchloroethylene   | 0.37  | 0  | 165.8 | 0    | 0    | 2.5  | 0.0   |
| Pergolide           | 0.30  | 4  | 314.5 | 1    | 2.5  | 4.5  | 20.0  |
| Pervertin           | 0.95  | 3  | 149.2 | 1    | 1.5  | 2.0  | 14.4  |
| Phencyclidine       | 0.70  | 0  | 243.4 | 0    | 1    | 3.6  | 4.3   |
| Phenothiazine       | −0.48 | 0  | 199.3 | 1    | 0.5  | 3.5  | 12.7  |
| Phenserine          | 1.00  | 2  | 337.4 | 1    | 6    | 2.5  | 50.4  |
| Phenylbutazone      | −0.50 | 3  | 308.4 | 0    | 5    | 4.1  | 53.0  |
| Phenytoin           | −0.04 | 2  | 252.3 | 2    | 3    | 2.5  | 59.3  |
| Physostigmine       | 0.10  | 1  | 275.4 | 1    | 6    | 1.1  | 54.3  |
| Pindolol            | −0.14 | 7  | 248.3 | 3    | 3.95 | 1.8  | 51.5  |
| Primidone           | −0.07 | 1  | 218.3 | 2    | 2    | 3.0  | 73.0  |
| Procaine            | 0.05  | 7  | 236.3 | 1.5  | 5    | 1.3  | 67.3  |
| Promazine           | 1.23  | 4  | 284.4 | 0    | 2.5  | 4.7  | 10.0  |
| Propranolol         | 0.64  | 7  | 259.3 | 2    | 3.95 | 3.1  | 41.5  |
| Pseudocumene        | 0.16  | 0  | 120.2 | 0    | 0    | 3.3  | 0.0   |
| Quinidine           | −0.50 | 5  | 324.4 | 1    | 5.45 | 3.4  | 39.1  |
| Ranitidine          | −1.23 | 10 | 314.4 | 2    | 6    | 0.8  | 78.5  |
| Ribavirin           | −0.67 | 5  | 244.2 | 5    | 12.3 | −2.5 | 154.9 |
| Risocaine           | 0.55  | 4  | 179.2 | 1.5  | 3    | 1.8  | 61.2  |
| Risperidone         | 0.00  | 3  | 410.5 | 0    | 7.5  | 3.2  | 69.9  |
| Rivastigmine        | 0.88  | 4  | 250.3 | 0    | 5    | 2.1  | 41.3  |
| Rolipram            | 0.61  | 3  | 275.3 | 1    | 4    | 2.2  | 61.7  |
| Ropinirole          | 0.08  | 7  | 260.4 | 1    | 4.5  | 2.8  | 50.8  |
| Salbutamol          | −1.03 | 8  | 239.3 | 4    | 5.15 | 0.5  | 74.4  |
| Salicylic acid      | −1.10 | 2  | 138.1 | 1    | 1.75 | 2.3  | 68.4  |
| Salicyluric acid    | −0.44 | 4  | 195.2 | 1.25 | 3.5  | 1.3  | 104.9 |
| Saquinavir          | −0.95 | 14 | 670.9 | 5    | 13.7 | 2.5  | 179.0 |
| Scopolamine         | 0.23  | 5  | 303.4 | 0    | 6.7  | 1.2  | 65.5  |
| Sertraline          | 1.60  | 1  | 306.2 | 1    | 1.5  | 4.9  | 12.5  |
| Sevoflurane         | 0.30  | 1  | 200.1 | 0    | 0    | 2.8  | 8.5   |
| Sotalol             | −0.28 | 7  | 272.4 | 3    | 7.7  | 0.2  | 83.7  |
| Spiperone           | 0.26  | 6  | 395.5 | 1    | 6    | 4.2  | 66.3  |
| Stavudine           | −0.48 | 2  | 224.2 | 2    | 6.9  | −0.1 | 100.4 |
| Sulforidazine       | 0.18  | 4  | 402.6 | 0    | 6.5  | 3.9  | 48.7  |
| Sulfur Hexafluoride | 0.40  | 0  | 146.1 | 0    | 0.5  | 2.7  | 0.0   |
| Tacrine             | −0.10 | 1  | 198.3 | 2    | 1.5  | 2.6  | 33.2  |
| Tamoxifen           | 0.92  | 9  | 371.5 | 0    | 2.75 | 6.3  | 14.8  |
| Teflurane           | 0.27  | 0  | 180.9 | 0    | 0    | 2.3  | 0.0   |
| Temelastine         | −1.90 | 8  | 442.4 | 2    | 6    | 4.2  | 87.5  |
| Terfenadine         | 0.64  | 11 | 471.7 | 2    | 4.45 | 6.5  | 38.1  |
| Tretinoin           | −0.49 | 9  | 300.4 | 1    | 2    | 5.3  | 49.3  |
| Theobromine         | −0.30 | 0  | 180.2 | 1    | 5    | 0.0  | 86.8  |
| Theophylline        | −0.29 | 0  | 180.2 | 1    | 5    | 0.0  | 87.1  |
| Thiopental          | −0.10 | 4  | 242.3 | 2    | 3.5  | 2.0  | 72.8  |
| Thioperamide        | −0.20 | 1  | 292.4 | 2    | 4    | 3.5  | 48.5  |
| Thioridazine        | 0.20  | 4  | 370.6 | 0    | 3    | 5.9  | 9.5   |
| Tiotidine           | −0.80 | 9  | 312.4 | 6    | 7.5  | 0.1  | 159.0 |
| Toliprolol          | 0.34  | 7  | 223.3 | 2    | 3.95 | 1.9  | 42.7  |
| Toluene             | 0.37  | 0  | 92.1  | 0    | 0    | 2.7  | 0.0   |

|                    |       |   |       |   |      |      |       |
|--------------------|-------|---|-------|---|------|------|-------|
| Triazolam          | 0.74  | 0 | 343.2 | 0 | 3    | 5.0  | 46.9  |
| Trichloroethene    | 0.34  | 0 | 131.4 | 0 | 0    | 2.4  | 0.0   |
| Trifluoroperazine  | 1.40  | 0 | 133.1 | 0 | 1    | 1.9  | 12.4  |
| Triflupromazine    | 1.44  | 4 | 352.4 | 0 | 2.5  | 5.5  | 10.1  |
| Tripropylphosphine | 1.02  | 6 | 160.2 | 0 | 0    | 4.9  | 0.0   |
| Urea               | −0.14 | 0 | 60.1  | 4 | 2    | −2.2 | 83.7  |
| Valproic acid      | −0.22 | 5 | 144.2 | 1 | 2    | 2.7  | 43.9  |
| Vinylbenzene       | 0.45  | 1 | 104.2 | 0 | 0    | 3.0  | 0.0   |
| Vinyltrichloride   | −0.10 | 0 | 133.4 | 0 | 0    | 2.5  | 0.0   |
| Zalcitabine        | −1.18 | 3 | 211.2 | 3 | 7.4  | −0.4 | 98.4  |
| Zanapexil          | 1.14  | 6 | 376.5 | 1 | 5    | 4.9  | 43.7  |
| Zidovudine         | −0.70 | 8 | 267.2 | 2 | 9.9  | −1.2 | 165.3 |
| Zolantidine        | 0.10  | 8 | 381.5 | 1 | 4.75 | 5.2  | 39.1  |
| Zolpidem           | −0.48 | 2 | 307.4 | 0 | 4.5  | 3.8  | 39.2  |

**Table S3.** The known drugs that have indication for the central nervous system and their corresponding KDI values.

| Drug                             | KDI <sub>2a</sub> | KDI <sub>2b</sub> |
|----------------------------------|-------------------|-------------------|
| Acamprosate                      | 4.31              | 0.05              |
| Acetaminophen or paracetamol     | 4.14              | 0.04              |
| Adenosine                        | 2.82              | 0.00              |
| Alfentanil hydrochloride         | 4.05              | 0.04              |
| Almotriptan                      | 5.63              | 0.68              |
| Alprazolam                       | 4.21              | 0.10              |
| Amantadine                       | 3.45              | 0.01              |
| Amitriptyline                    | 3.60              | 0.04              |
| Amisulpride                      | 4.76              | 0.20              |
| Amobarbital                      | 5.13              | 0.32              |
| Amoxapine                        | 4.65              | 0.18              |
| Amphetamine or dextroamphetamine | 3.77              | 0.01              |
| Aniracetam                       | 4.39              | 0.12              |
| Apomorphine                      | 4.94              | 0.29              |
| Aprepitant or fosaprepitant      | 4.87              | 0.20              |
| Aripiprazole                     | 5.14              | 0.38              |
| Asenapine                        | 3.62              | 0.04              |
| Atomoxetine                      | 4.34              | 0.12              |
| Azasetron                        | 5.18              | 0.39              |
| Baclofen                         | 4.12              | 0.06              |
| Barbital                         | 4.41              | 0.09              |
| Bemegride or megimide            | 3.96              | 0.04              |
| Benactyzine                      | 5.04              | 0.29              |
| Benperidol                       | 5.80              | 0.81              |
| Benzhexol or trihexyphenidyl     | 4.42              | 0.14              |
| Benzphetamine                    | 3.62              | 0.03              |
| Benztropine or benztropine       | 4.39              | 0.12              |
| Biperiden                        | 4.60              | 0.18              |
| Bromazepam                       | 4.99              | 0.28              |

|                                    |      |      |
|------------------------------------|------|------|
| Bromocriptine                      | 3.92 | 0.01 |
| Brotizolam                         | 4.23 | 0.10 |
| Buprenorphine                      | 4.95 | 0.29 |
| Bupropion                          | 4.66 | 0.18 |
| Buspirone                          | 5.34 | 0.43 |
| Butabarbital                       | 4.91 | 0.23 |
| Butorphanol                        | 5.43 | 0.53 |
| Butriptyline                       | 3.81 | 0.05 |
| Cabergoline                        | 5.10 | 0.35 |
| Caffeine                           | 3.70 | 0.03 |
| Cannabidiol                        | 4.24 | 0.09 |
| Carbamazepine                      | 4.19 | 0.08 |
| Carisoprodol                       | 4.96 | 0.30 |
| Carisoprodol                       | 4.96 | 0.30 |
| Citalopram                         | 5.01 | 0.30 |
| Chlordiazepoxide                   | 4.53 | 0.14 |
| Chlormezanone                      | 3.11 | 0.01 |
| Chlorphenesin                      | 3.94 | 0.05 |
| Chlorpromazine                     | 4.57 | 0.09 |
| Chlorzoxazone                      | 4.29 | 0.11 |
| Cisatracurium besilate             | 1.66 | 0.00 |
| Clobazam                           | 4.66 | 0.17 |
| Clomipramine                       | 4.07 | 0.07 |
| Clonazepam                         | 5.16 | 0.38 |
| Clorazepate                        | 4.67 | 0.19 |
| Clozapine                          | 4.73 | 0.20 |
| Cocaine                            | 5.21 | 0.38 |
| Codeine                            | 4.94 | 0.30 |
| Cyclobenzaprine                    | 3.73 | 0.04 |
| Dalfampridine or Fampridine        | 3.47 | 0.01 |
| Dantrolene                         | 5.14 | 0.35 |
| Desipramine or desmethylinipramine | 4.15 | 0.09 |
| Dexfenfluramine                    | 4.10 | 0.06 |
| Dexmedetomidine                    | 4.01 | 0.06 |
| Dextromethorphan                   | 3.86 | 0.06 |
| Dezocine                           | 4.26 | 0.10 |
| Diazepam                           | 4.40 | 0.13 |
| Dibenzepin                         | 4.89 | 0.25 |
| Diethylpropion                     | 4.19 | 0.08 |
| Dihydrocodeine                     | 5.08 | 0.36 |
| Dihydroergotamine                  | 4.05 | 0.02 |
| Dolasetron                         | 5.14 | 0.35 |
| Donepezil                          | 5.00 | 0.30 |
| Doxapram                           | 5.19 | 0.36 |
| Doxepin                            | 4.03 | 0.08 |
| Doxylamine                         | 4.45 | 0.14 |
| Droperidol                         | 5.80 | 0.81 |
| Dyclonine                          | 4.56 | 0.17 |
| Edaravone                          | 3.52 | 0.02 |
| Eletriptan                         | 5.66 | 0.70 |



|                               |      |      |
|-------------------------------|------|------|
| Eperisone                     | 4.56 | 0.16 |
| Ephedrine                     | 4.34 | 0.07 |
| Estazolam                     | 4.22 | 0.10 |
| Ethchlorvynol                 | 3.84 | 0.01 |
| Ethosuximide                  | 3.88 | 0.03 |
| Ezogabine or retigabine       | 5.28 | 0.43 |
| Felbamate                     | 4.10 | 0.08 |
| Fentanyl citrate              | 4.87 | 0.25 |
| Flunitrazepam                 | 4.96 | 0.27 |
| Fluoxetin or Fluoxetine       | 4.36 | 0.12 |
| Flupenthixol or flupentixol   | 4.97 | 0.31 |
| Fluphenazine                  | 4.99 | 0.32 |
| Flurazepam                    | 5.24 | 0.39 |
| Fluvoxamine                   | 4.97 | 0.14 |
| Frovatriptan                  | 4.23 | 0.10 |
| Gabapentin                    | 3.82 | 0.02 |
| Galantamine                   | 5.13 | 0.38 |
| Gamma Hydroxybutyric acid     | 4.19 | 0.02 |
| Glutethimide                  | 4.40 | 0.12 |
| Granisetron                   | 5.44 | 0.54 |
| Halazepam                     | 4.57 | 0.17 |
| Haloperidol                   | 5.40 | 0.52 |
| Heroin or diamorphine         | 5.07 | 0.32 |
| Hexobarbitone or hexobarbital | 4.51 | 0.14 |
| Hydromorphone                 | 4.96 | 0.30 |
| Hyoscine or scopolamine       | 5.06 | 0.32 |
| Imipramine or melipramine     | 3.97 | 0.07 |
| Isoflurane                    | 2.92 | 0.00 |
| Istradefylline                | 5.13 | 0.34 |
| Ketamine                      | 4.25 | 0.11 |
| Ketazolam                     | 4.85 | 0.21 |
| Lacosamide                    | 5.10 | 0.33 |
| Lamotrigine                   | 4.50 | 0.14 |
| Levallorphan                  | 4.71 | 0.21 |
| Levetiracetam                 | 4.31 | 0.04 |
| Levodopa                      | 3.16 | 0.00 |
| Levorphanol                   | 4.31 | 0.12 |
| Lofepramine                   | 4.34 | 0.12 |
| Lofexidine                    | 4.63 | 0.19 |
| Lorazepam                     | 5.50 | 0.55 |
| Lorcaserin                    | 3.44 | 0.02 |
| Lormetazepam                  | 5.41 | 0.50 |
| Loxapine                      | 4.34 | 0.11 |
| Meclizine or meclozine        | 4.34 | 0.11 |
| Melatonin                     | 5.00 | 0.27 |
| Memantine                     | 3.59 | 0.02 |
| Meperidine or pethidine       | 4.41 | 0.14 |
| Mephenesin                    | 4.65 | 0.13 |
| Mephenytoin                   | 4.54 | 0.14 |
| Meprobamate                   | 3.93 | 0.05 |

|                                       |      |      |
|---------------------------------------|------|------|
| Mepyramine or pyrilamine              | 4.48 | 0.15 |
| Mesoridazine                          | 5.50 | 0.55 |
| Methadone                             | 4.48 | 0.16 |
| Methamphetamine                       | 3.69 | 0.02 |
| Methocarbamol                         | 4.69 | 0.19 |
| Methohexital                          | 5.32 | 0.45 |
| Methotrimeprazine or Levomepromazine  | 4.33 | 0.12 |
| Methoxyflurane                        | 2.89 | 0.00 |
| Methylidopa                           | 3.29 | 0.00 |
| Methsuximide or mesuximide            | 3.81 | 0.04 |
| Methylphenidate or Dexmethylphenidate | 3.79 | 0.05 |
| Mianserin                             | 3.65 | 0.04 |
| Midazolam                             | 3.79 | 0.05 |
| Mirtazapine                           | 3.87 | 0.06 |
| Moclobemide                           | 5.29 | 0.44 |
| Modafinil                             | 5.34 | 0.47 |
| Morphine                              | 5.10 | 0.35 |
| Nabilone                              | 4.77 | 0.22 |
| Nalbuphine                            | 5.70 | 0.72 |
| Naloxone                              | 5.73 | 0.75 |
| Naltrexone                            | 5.81 | 0.82 |
| Naratriptan                           | 5.84 | 0.85 |
| Nefopam                               | 3.79 | 0.05 |
| Nicergoline                           | 4.85 | 0.24 |
| Nitrazepam                            | 4.96 | 0.30 |
| Nortriptyline                         | 3.97 | 0.06 |
| Olanzapine                            | 4.68 | 0.19 |
| Ondansetron                           | 4.51 | 0.17 |
| Oxazepam                              | 5.32 | 0.45 |
| Oxcarbazepine                         | 4.61 | 0.16 |
| Oxycodone                             | 5.35 | 0.49 |
| Oxymorphone                           | 5.27 | 0.43 |
| Paliperidone                          | 5.21 | 0.36 |
| Palonosetron                          | 4.41 | 0.12 |
| Paraldehyde                           | 3.11 | 0.01 |
| Paroxetine                            | 5.13 | 0.38 |
| Pemoline                              | 4.29 | 0.06 |
| Pentazocine                           | 4.66 | 0.20 |
| Pentobarbital                         | 5.18 | 0.33 |
| Perampanel                            | 5.24 | 0.40 |
| Pergolide                             | 4.56 | 0.16 |
| Perphenazine                          | 5.14 | 0.38 |
| Phendimetrazine                       | 3.39 | 0.02 |
| Phenobarbital                         | 4.69 | 0.19 |
| Phenprobamate                         | 4.57 | 0.10 |
| Phentermine                           | 3.80 | 0.02 |
| Phenytoin or fosphenytoin             | 4.75 | 0.19 |
| Prazepam                              | 4.70 | 0.22 |
| Protriptyline                         | 4.06 | 0.07 |

|                  |      |      |
|------------------|------|------|
| Pregabalin       | 3.68 | 0.01 |
| Primidone        | 4.37 | 0.10 |
| Prochlorperazine | 4.59 | 0.15 |
| Promazine        | 3.97 | 0.07 |
| Promethazine     | 3.81 | 0.05 |
| Propiomazine     | 4.98 | 0.29 |
| Propofol         | 3.74 | 0.02 |
| Propoxyphene     | 4.35 | 0.13 |
| Quazepam         | 3.90 | 0.06 |
| Quetiapine       | 5.52 | 0.60 |
| Ramosetron       | 4.97 | 0.31 |
| Rasagiline       | 3.89 | 0.03 |
| Reboxetine       | 5.24 | 0.43 |
| Remifentanyl     | 4.60 | 0.17 |
| Remoxipride      | 5.61 | 0.65 |
| Reserpine        | 3.38 | 0.01 |
| Riluzole         | 4.49 | 0.13 |
| Risperidone      | 5.19 | 0.37 |
| Rivastigmine     | 4.78 | 0.21 |
| Rizatriptan      | 5.34 | 0.47 |
| Rocuronium       | 4.28 | 0.08 |
| Ropinirole       | 5.02 | 0.32 |
| Rotigotine       | 4.41 | 0.14 |
| Rufinamide       | 5.06 | 0.30 |
| Secobarbital     | 5.17 | 0.35 |
| Selegiline       | 3.75 | 0.03 |
| Sertraline       | 3.80 | 0.05 |
| Sevoflurane      | 3.03 | 0.01 |
| Sibutramine      | 3.83 | 0.05 |
| Stiripentol      | 4.76 | 0.21 |
| Succinylcholine  | 4.50 | 0.14 |
| Sufentanyl       | 4.65 | 0.19 |
| Sumatriptan      | 5.44 | 0.54 |
| Tacrine          | 4.03 | 0.06 |
| Tapentadol       | 4.41 | 0.12 |
| Temazepam        | 5.28 | 0.43 |
| Tetrabenazine    | 5.22 | 0.38 |
| Thiethylperazine | 4.59 | 0.16 |
| Thiopental       | 5.16 | 0.35 |
| Thioridazine     | 3.94 | 0.05 |
| Thiothixene      | 4.79 | 0.23 |
| Tiagabine        | 5.50 | 0.59 |
| Tizanidine       | 5.11 | 0.35 |
| Tolcapone        | 5.22 | 0.41 |
| Tolperisone      | 4.50 | 0.14 |
| Topiramate       | 5.03 | 0.32 |
| Tramadol         | 4.84 | 0.25 |
| Trazodone        | 5.35 | 0.44 |
| Triazolam        | 4.22 | 0.10 |
| Triflupromazine  | 3.93 | 0.05 |

|                                                                                            |      |      |
|--------------------------------------------------------------------------------------------|------|------|
| Trimethobenzamide                                                                          | 4.85 | 0.18 |
| Tropisetron                                                                                | 4.54 | 0.17 |
| Troxidone or trimethadione or tridione or<br>trimethin or Trimetadione or<br>minoaleviatin | 3.44 | 0.01 |
| Valproate or valproic acid                                                                 | 4.25 | 0.04 |
| Valpromide                                                                                 | 4.14 | 0.04 |
| Venlafaxine                                                                                | 5.04 | 0.32 |
| Vigabatrin                                                                                 | 3.65 | 0.01 |
| Vilazodone                                                                                 | 5.07 | 0.36 |
| Viloxazine                                                                                 | 4.92 | 0.26 |
| Vortioxetine                                                                               | 4.35 | 0.13 |
| Zaleplon                                                                                   | 5.24 | 0.39 |
| Ziprasidone                                                                                | 5.61 | 0.66 |
| Zolmitriptan                                                                               | 5.62 | 0.65 |
| Zolpidem                                                                                   | 4.80 | 0.24 |
| Zonisamide                                                                                 | 4.64 | 0.13 |
| Zopiclone or eszopiclone                                                                   | 3.85 | 0.04 |
| Zotepine                                                                                   | 4.14 | 0.08 |
| KDI AVERAGES CNS DRUGS                                                                     | 4.54 | 0.21 |
| SD CNS DRUGS                                                                               | 0.67 | 0.19 |
